# Supplementary figures and images for: Genetic deficiency of aldose reductase counteracts the development of diabetic nephropathy in C57BL/6 mice
Source: PubMed Central journal article supplement — Diabetologia. 2011 Jan 27;54(5):1242–51. doi: 10.1007/s00125-011-2045-4 (PMC3071933; doi:10.1007/s00125-011-2045-4), 2011-01-27

**WT**

**KO**

**BT**

**Cit**

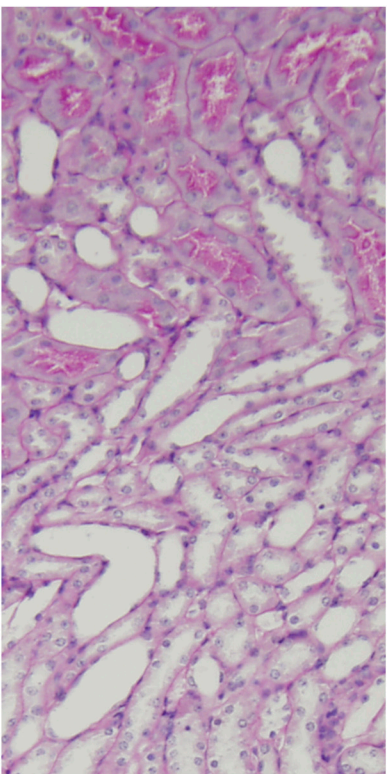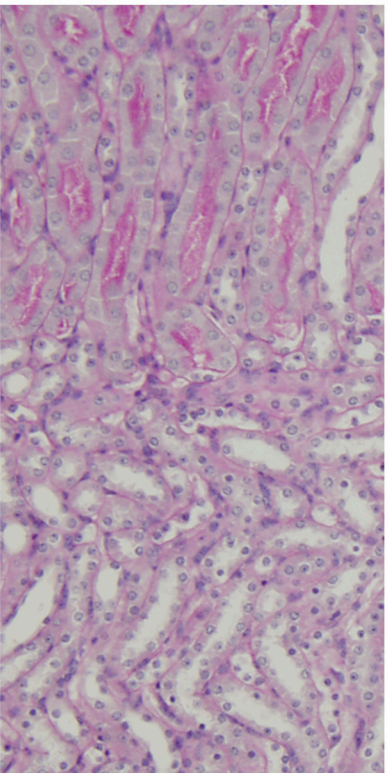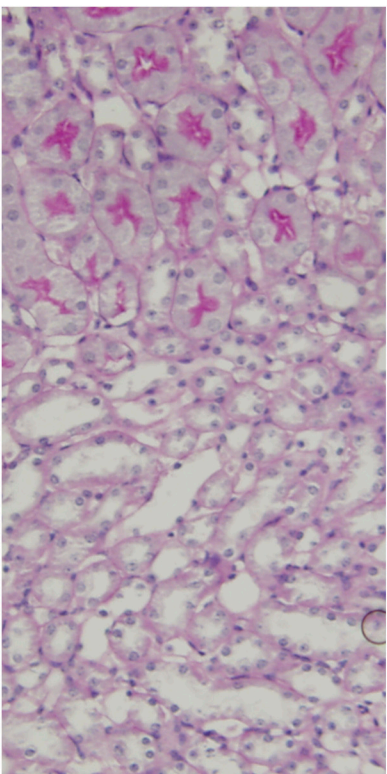

**STZ**

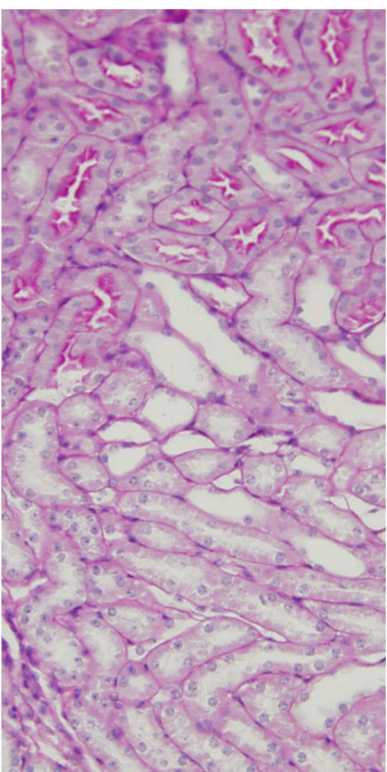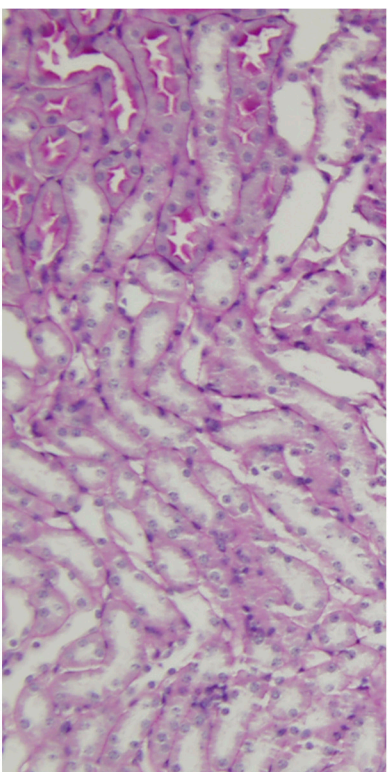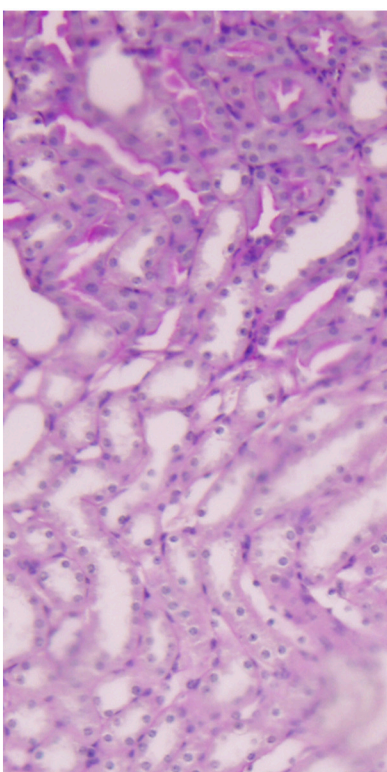

Supplement: 125_2011_2045_MOESM1_ESM.pdf [file 125_2011_2045_MOESM1_ESM.pdf]

**WT**

**KO**

**BT**

**Cit**

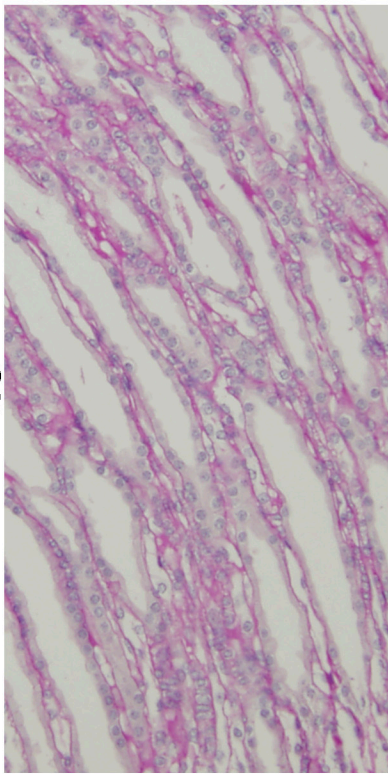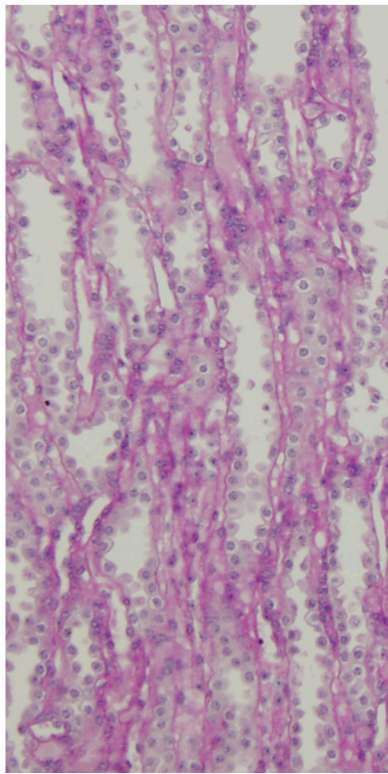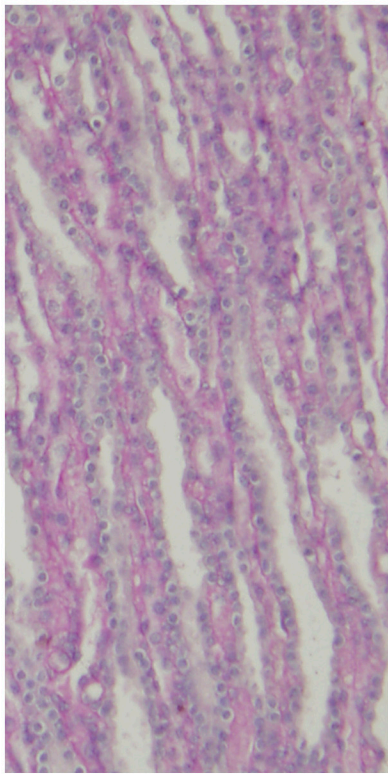

**STZ**

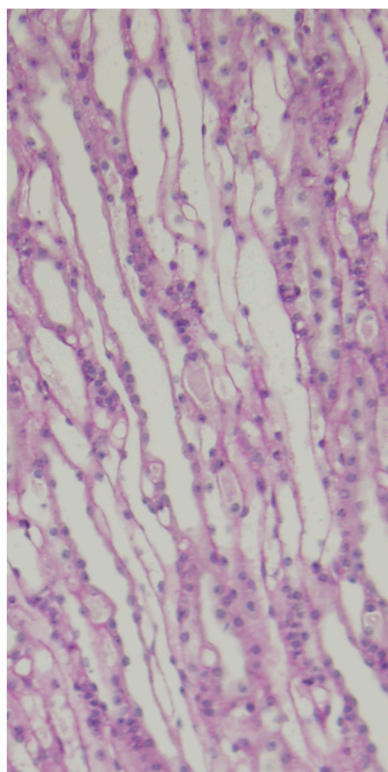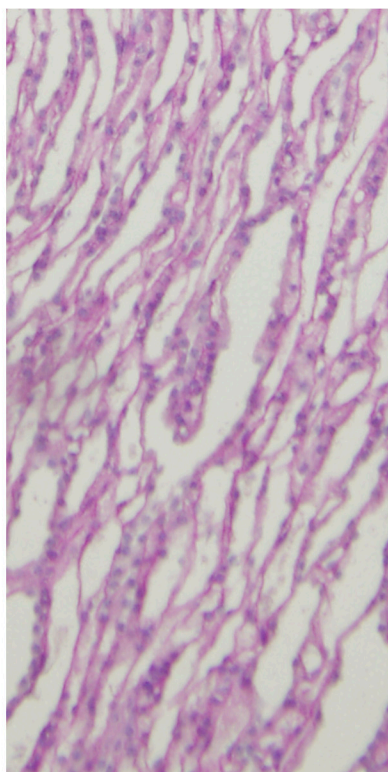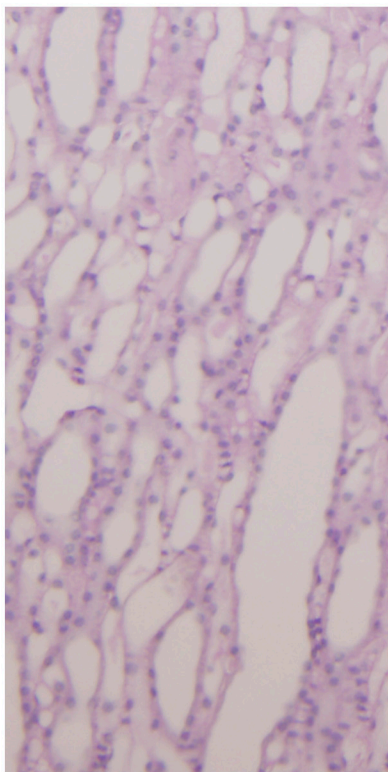

Supplement: 125_2011_2045_MOESM2_ESM.pdf [file 125_2011_2045_MOESM2_ESM.pdf]

a

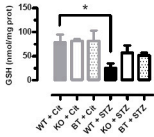

b

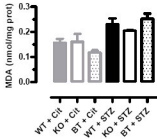

c

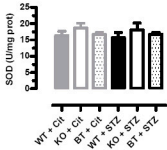

Supplement: 125_2011_2045_MOESM3_ESM.pdf [file 125_2011_2045_MOESM3_ESM.pdf]
